# Supplementary material for: Suppression of miR-21-5p by Ginsenoside Rb1 Prevents Atherosclerosis and Attenuates Endothelial Dysfunction by Inducing&nbsp;KRIT1
Source: Research Square preprint supplement (doi:10.21203/rs.3.rs-400608/v1), 2021-04-13

**Figure S1 Dual luciferase assay verification of the binding of miR-21-5p to the 3’UTR sequence of KRTI1 gene in HUVECs. “*” represented P < 0.05 vs. WT+NC group.**

**Raw gel images**

**Figure 4B**


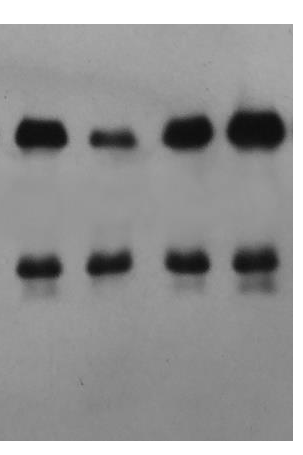


Figure 5B


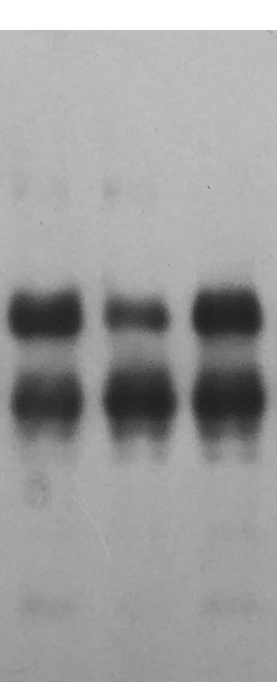


**Figure 6B**


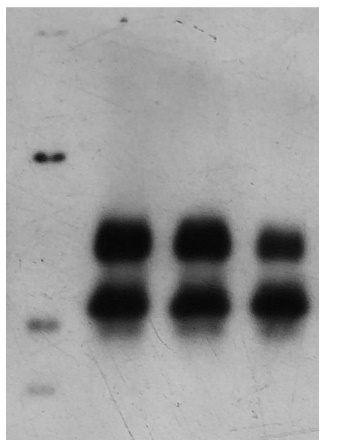

Supplement: Supplementary file 1 [file 127ba249cfda753e0fe268fa.docx]
